# Supplementary material
Source: PubMed Central journal article supplement (PMC2708953)
Supplement: jc.2008-2704_1.pdf [file jc.2008-2704_1.pdf]

Supplemental Table 1 – Characteristics of SNPs identified by re-sequencing

| Variant Name | Chromosomal location <sup>a</sup> | MAF <sup>b</sup> | Functional Consequence | Genotyping Method              |
|--------------|-----------------------------------|------------------|------------------------|--------------------------------|
| lmna1        | 152894590                         | 0.01             | noncoding              | Genotyped Illumina             |
| lmna2        | 152894615                         | 0.01             | noncoding              | Genotyped Taqman               |
| lmna3        | 152894620                         | 0.01             | noncoding              | Genotyped Illumina             |
| rs955383     | 152895103                         | 0.48             | noncoding              | Genotyped Illumina             |
| lmna4        | 152895569                         | 0.01             | noncoding              | Genotyped Illumina             |
| lmna5        | 152895571                         | 0.01             | noncoding              | Genotyped Taqman               |
| lmna6        | 152895697                         | 0.01             | noncoding              | Genotyped Illumina             |
| lmna7        | 152895753                         | 0.05             | noncoding              | Genotyped Illumina             |
| rs11584621   | 152896124                         | 0.43             | noncoding              | Failed Illumina &Taqman design |
| rs2485662    | 152896541                         | 0.26             | noncoding              | Failed Illumina &Taqman design |
| rs2485661    | 152896569                         | 0.05             | noncoding              | Failed Illumina &Taqman design |
| lmna11       | 152898076                         | 0.02             | GAG (GLU) to GAT(ASP)  | Genotyped Illumina             |
| rs547915     | 152898448                         | 0.15             | noncoding              | Genotyped Illumina             |
| rs528636     | 152911693                         | 0.05             | noncoding              | Genotyped Illumina             |
| rs543235     | 152911763                         | 0.01             | noncoding              | Genotyped Illumina             |
| rs665979     | 152912703                         | 0.11             | noncoding              | Genotyped Taqman               |
| rs513043     | 152912742                         | 0.12             | noncoding              | Genotyped Taqman               |
| rs666869     | 152912903                         | 0.06             | noncoding              | Genotyped Illumina             |
| rs509551     | 152913122                         | 0.10             | noncoding              | Genotyped Illumina             |
| rs508641     | 152913212                         | 0.08             | noncoding              | Genotyped Illumina             |
| lmna12       | 152913310                         | 0.07             | noncoding              | Failed Illumina &Taqman design |
| lmna13       | 152913799                         | 0.02             | noncoding              | Genotyped Illumina             |
| rs480886     | 152913911                         | 0.09             | noncoding              | Genotyped Taqman               |
| rs682267     | 152914021                         | 0.09             | noncoding              | Failed Illumina &Taqman design |
| lmna16       | 152914734                         | 0.02             | noncoding              | Genotyped Illumina             |
| rs2485667    | 152914804                         | 0.06             | noncoding              | Genotyped Taqman               |
| lmna17       | 152914886                         | 0.05             | noncoding              | Genotyped Taqman               |
| rs2430416    | 152914902                         | 0.05             | noncoding              | Failed Illumina &Taqman design |
| rs2430415    | 152914906                         | 0.08             | noncoding              | Failed Illumina &Taqman design |
| lmna18       | 152915040                         | 0.02             | noncoding              | Failed Illumina &Taqman design |
| rs2908712    | 152915173                         | 0.08             | noncoding              | Genotyped Taqman               |
| lmna19       | 152915188                         | 0.02             | noncoding              | Failed Illumina &Taqman design |
| rs2993266    | 152915205                         | 0.08             | noncoding              | Failed Illumina &Taqman design |
| lmna20       | 152916811                         | 0.07             | noncoding              | Genotyped Illumina             |
| rs569025     | 152917070                         | 0.11             | noncoding              | Genotyped Illumina             |
| rs11264442   | 152917448                         | 0.02             | noncoding              | Genotyped Taqman               |
| rs11264443   | 152917465                         | 0.02             | noncoding              | Failed Illumina &Taqman design |
| rs538089     | 152918101                         | 0.09             | synonymous             | Genotyped Illumina             |
| rs2485664    | 152918410                         | 0.08             | noncoding              | Genotyped Illumina             |
| lmna21       | 152918604                         | 0.03             | noncoding              | Genotyped Illumina             |
| lmna22       | 152919041                         | 0.02             | noncoding              | Failed Illumina &Taqman design |

|           |           |      |                      |                    |
|-----------|-----------|------|----------------------|--------------------|
| rs505058  | 152919258 | 0.10 | synonymous           | Genotyped Illumina |
| lmna24    | 152919283 | 0.02 | CGC(ARG) to TGC(CYS) | Genotyped Taqman   |
| rs476000  | 152919442 | 0.13 | noncoding            | Genotyped Illumina |
| lmna26    | 152919605 | 0.02 | noncoding            | Genotyped Illumina |
| rs553016  | 152919936 | 0.11 | noncoding            | Genotyped Illumina |
| lmna27    | 152920127 | 0.01 | noncoding            | Genotyped Illumina |
| lmna28    | 152920149 | 0.01 | noncoding            | Genotyped Taqman   |
| rs4641    | 152920607 | 0.15 | synonymous           | Genotyped Illumina |
| lmna29    | 152920873 | 0.06 | noncoding            | Genotyped Illumina |
| lmna30    | 152921081 | 0.02 | noncoding            | Genotyped Illumina |
| rs520973  | 152921092 | 0.12 | noncoding            | Genotyped Taqman   |
| rs520910  | 152921121 | 0.12 | noncoding            | Genotyped Taqman   |
| lmna31    | 152921161 | 0.02 | noncoding            | Genotyped Illumina |
| lmna35    | 152923157 | 0.02 | noncoding            | Genotyped Illumina |
| rs1538215 | 152923711 | 0.10 | noncoding            | Genotyped Illumina |

<sup>a</sup> From NCBI build 35

<sup>b</sup> Based on sequencing of PCOS probands
