# Supplementary material
Source: PubMed Central journal article supplement (PMC2708953)
Supplement: jc.2008-2704_2.pdf [file jc.2008-2704_2.pdf]

Supplemental Table 2 – Genetic analysis of dichotomous traits

| Name       | ObsHET | PredHET | HWpval | %Geno | MAF   | PCOS       |         | Metabolic syndrome |         |
|------------|--------|---------|--------|-------|-------|------------|---------|--------------------|---------|
|            |        |         |        |       |       | Chi-square | p-value | Chi-square         | p-value |
| rs6700693  | 0.289  | 0.290   | 0.942  | 99    | 0.176 | 2.79       | 0.095   | 5.94               | 0.015   |
| rs915179   | 0.472  | 0.475   | 0.850  | 99    | 0.389 | 2.20       | 0.138   | 2.26               | 0.133   |
| lmna1      | 0.043  | 0.042   | 1.000  | 100   | 0.021 | 0.51       | 0.476   | 0.01               | 0.913   |
| lmna2      | 0.043  | 0.046   | 0.214  | 86    | 0.024 | 1.02       | 0.313   | 0.65               | 0.419   |
| lmna3      | 0.035  | 0.041   | 0.003  | 99    | 0.021 | 1.00       | 0.317   | 0.01               | 0.921   |
| rs955383   | 0.359  | 0.375   | 0.158  | 100   | 0.250 | 0.10       | 0.753   | 0.02               | 0.879   |
| rs547915   | 0.177  | 0.180   | 0.676  | 94    | 0.100 | 0.03       | 0.864   | 2.49               | 0.114   |
| rs622834   | 0.107  | 0.112   | 0.244  | 99    | 0.059 | 1.71       | 0.191   | 0.00               | 0.977   |
| rs528636   | 0.146  | 0.158   | 0.023  | 99    | 0.086 | 0.02       | 0.897   | 0.80               | 0.372   |
| rs543235   | 0.112  | 0.114   | 0.561  | 100   | 0.061 | 1.03       | 0.310   | 0.00               | 0.994   |
| rs665979   | 0.105  | 0.108   | 0.472  | 84    | 0.057 | 0.01       | 0.919   | 0.12               | 0.727   |
| rs513043   | 0.137  | 0.147   | 0.068  | 80    | 0.080 | 0.02       | 0.901   | 1.44               | 0.230   |
| rs666869   | 0.108  | 0.113   | 0.261  | 99    | 0.060 | 0.36       | 0.551   | 0.07               | 0.795   |
| rs509551   | 0.113  | 0.118   | 0.334  | 97    | 0.063 | 0.02       | 0.882   | 0.09               | 0.765   |
| rs508641   | 0.103  | 0.106   | 0.341  | 99    | 0.056 | 0.07       | 0.795   | 0.02               | 0.885   |
| rs569025   | 0.143  | 0.156   | 0.008  | 100   | 0.085 | 0.05       | 0.816   | 1.22               | 0.269   |
| rs11264442 | 0.047  | 0.051   | 0.057  | 83    | 0.026 | 0.98       | 0.324   | 2.48               | 0.116   |
| rs538089   | 0.141  | 0.151   | 0.046  | 99    | 0.082 | 0.98       | 0.322   | 1.54               | 0.215   |
| rs2485664  | 0.149  | 0.157   | 0.105  | 100   | 0.086 | 4.02       | 0.045   | 0.90               | 0.343   |
| lmna21     | 0.019  | 0.019   | 1.000  | 99    | 0.010 | 1.46       | 0.226   | 4.81               | 0.028   |
| rs505058   | 0.140  | 0.156   | 0.003  | 99    | 0.085 | 1.02       | 0.313   | 0.78               | 0.376   |
| lmna24     | 0.006  | 0.010   | 0.0003 | 83    | 0.005 | 10.73*     | 0.001   | 3.18               | 0.075   |
| rs476000   | 0.174  | 0.180   | 0.269  | 99    | 0.100 | 1.56       | 0.212   | 2.81               | 0.094   |
| rs553016   | 0.148  | 0.155   | 0.153  | 99    | 0.085 | 1.03       | 0.310   | 1.61               | 0.204   |
| rs4641     | 0.397  | 0.389   | 0.558  | 99    | 0.264 | 1.08       | 0.298   | 0.67               | 0.412   |
| rs520973   | 0.140  | 0.149   | 0.125  | 85    | 0.081 | 0.00       | 0.977   | 2.36               | 0.125   |
| rs520910   | 0.140  | 0.153   | 0.014  | 83    | 0.084 | 1.15       | 0.284   | 1.95               | 0.162   |
| rs1468772  | 0.393  | 0.403   | 0.422  | 99    | 0.280 | 1.22       | 0.270   | 3.13               | 0.077   |
| rs4661033  | 0.452  | 0.467   | 0.283  | 98    | 0.372 | 0.37       | 0.546   | 2.35               | 0.125   |
| rs3738582  | 0.329  | 0.352   | 0.032  | 99    | 0.228 | 0.08       | 0.778   | 0.67               | 0.415   |
| rs12128066 | 0.447  | 0.466   | 0.188  | 100   | 0.369 | 0.23       | 0.631   | 0.69               | 0.408   |

\* p value = 0.03 after correction for multiple testing
